# Supplementary material
Source: PubMed Central journal article supplement (PMC3076831)
Supplement: 1100454108_pnas.201100454SI.pdf [file 1100454108_pnas.201100454SI.pdf]

# Supporting Information

Börjesson et al. 10.1073/pnas.1100454108

## SI Materials and Methods

**Generation of Mice.** The generation of ER $\alpha$ -deficient mice (ER $\alpha^{-/-}$ ) has previously been described (1). These mice have a deletion in exon 3 of the ER $\alpha$  gene and they do not express any of the isoforms of the ER $\alpha$  protein (1). The ER $\alpha^{-/-}$  mice and WT control (ER $\alpha^{+/+}$ ) littermates were inbred C57BL/6 mice and generated by breeding male ER $\alpha^{+/+}$  with female ER $\alpha^{+/+}$  mice. The generation of ER $\alpha$  AF-1-deficient (ER $\alpha$ AF-1<sup>0</sup>) mice has previously been described (2). These mice have a deletion of 441 bp of exon 1, corresponding to aa 2 to 148, with a preserved translational initiation codon in exon 1 (ATG1; Fig. 1A). The ER $\alpha$ AF-1<sup>0</sup> mice do not express any full-length 66-kDa protein (2). Instead they express a truncated 49-kDa ER $\alpha$  protein that lacks AF-1 and also the physiologically occurring but less abundantly expressed 46-kDa ER $\alpha$  isoform initiated by a second translational initiation codon in exon 2 (ATG2; Fig. 1A). The ER $\alpha$ AF-1<sup>0</sup> mice and WT control (ER $\alpha$ AF-1<sup>+/+</sup>) littermates were inbred C57BL/6 mice and generated by breeding male ER $\alpha$ AF-1<sup>+/+</sup> with female ER $\alpha$ AF-1<sup>+/+</sup> mice. The ER $\alpha$ AF-2-deficient (ER $\alpha$ AF-2<sup>0</sup>) mice were generated through the strategy outlined in Fig. 1A. Briefly, ER $\alpha$ AF-2<sup>0</sup> mice have a deletion of the AF-2 core that resides within exon 8 and corresponds to aa 543 to 549 (Fig. 1A). Western blot analysis demonstrated that ER $\alpha$ AF-2<sup>0</sup> but not ER $\alpha^{-/-}$  mice express proteins initiated from the initiation codon in exon 1 (ATG1) and the initiation codon in exon 2 (ATG2; Fig. 1B). The sizes of these proteins in ER $\alpha$ AF-2<sup>0</sup> mice are slightly smaller (corresponding to the 7-aa truncation located in the AF-2 region) than the WT ER $\alpha$  proteins of 66 kDa and 46 kDa, respectively. The ER $\alpha$ AF-2<sup>0</sup> mice and WT control (ER $\alpha$ AF-2<sup>+/+</sup>) littermates were inbred C57BL/6 mice and generated by breeding male ER $\alpha$ AF-2<sup>+/+</sup> with female ER $\alpha$ AF-2<sup>+/+</sup> mice.

The following primer pairs were used for genotyping the mice. For genotyping the ER $\alpha$ AF-1<sup>0</sup> mice, primer pair 1 was used: P1:1 (5'-TGAAAGAACATTGAACCCGACACAAT-3') and P1:2 (5'-GCCTTCTACAGGTACCCGCGCCACAT-3'). For genotyping the ER $\alpha$ AF-2<sup>0</sup> mice, primer pair 2 was used: P2:1 (5'-ATGAATTCTTAATAGGTTTAAAAAATGACT-3') and P2:2 (5'-TGTGCTGAAGTGGAGCTGGT-3'). Primer pairs 3 and 4 were used to genotype the ER $\alpha^{-/-}$  mice: P3:1 (5'-TTGCCCGATAACAATAACAT-3') and P3:2 (5'-ATTGTCTCTTTCTGACAC-3'); as well as P4:1 (5'-GGCATTACTTCTCCTGGAGTCT-3') and P4:2 (5'-TCGCTTTCCTGAACCTTTCATAT-3') (1).

**Western Blot.** Western Blot and protein preparation from uteri from ER $\alpha^{-/-}$  and ER $\alpha$ AF-2<sup>0</sup> mice were essentially performed as described previously (3). The uteri were homogenized in lysis buffer and a mixture of protease inhibitors (complete Mini EDTA-free; Roche Diagnostics). The rabbit polyclonal ER $\alpha$  antibody (MC-20) and mouse monoclonal actin antibody (C-2; Santa Cruz Biotechnology), both diluted 1:500, were used. HRP-linked secondary antibodies, anti-rabbit and anti-mouse, respectively (GE Healthcare), were diluted 1:30,000 and used to visualize the bands.

**pQCT.** CT scans were performed with the pQCT XCT RESEARCH M (version 4.5B; Norland), operating at a resolution of 70  $\mu$ m as described previously (4). The scan was positioned in the metaphysis of the femur at a distance proximal from the distal growth plate corresponding to 3.4% of the total length of the femur, and the trabecular bone region was defined as the inner

45% of the total cross-sectional area. Cortical bone parameters were analyzed in the middiaphyseal region of the femur (5).

**Micro-CT.** Micro-CT analyses were performed on the distal femur and lumbar vertebra (L5) by using a model 1072 scanner (Sky-scan), imaged with an X-ray tube voltage of 100 kV and current of 98  $\mu$ A, with a 1-mm aluminum filter (6). The scanning angular rotation was 180° and the angular increment 0.90°. The voxel size was 6.51  $\mu$ m isotropically. Datasets were reconstructed by using a modified Feldkamp algorithm and segmented into binary images by using adaptive local thresholding (7). In the femur, the trabecular bone proximal to the distal growth plate was selected for analyses within a conforming volume of interest (cortical bone excluded) commencing at a distance of 338.5  $\mu$ m from the growth plate, and extending a further longitudinal distance of 488  $\mu$ m in the proximal direction. Cortical measurements were performed in the diaphyseal region of femur starting at a distance of 5.2 mm from the growth plate and extending a further longitudinal distance of 163  $\mu$ m in the proximal direction. In the vertebra, the trabecular bone in the vertebral body caudal of the pedicles was selected for analyses within a conforming volume of interest (cortical bone excluded) commencing at a distance of 6.5  $\mu$ m caudal of the lower end of the pedicles, and extending a further longitudinal distance of 325.5  $\mu$ m in the caudal direction. Trabecular thickness and separation were calculated by the sphere-fitting local thickness method (8).

**Histomorphometric Analyses. Trabecular bone.** L4 vertebrae were fixed in 4% paraformaldehyde, dehydrated in 70% EtOH, and embedded in plastic (L R White Resin; Agar Scientific). The trabecular bone was analyzed by using longitudinal coronary sections of the vertebrae. Sections 4  $\mu$ m thick were stained with Masson–Goldner trichrome (9, 10). The parameters were measured by using the OsteoMeasure histomorphometry analysis system with software version 2.2 (OsteoMetrics) and following the guidelines of the American Society for Bone and Mineral Research (11).

**Cortical bone.** Femurs were fixed in Bürckhardt fixative, dehydrated in 70% EtOH, and embedded in plastic (L R White Resin; Agar Scientific). For the measurement of dynamic parameters, the mice were double-labeled with calcein, which was injected (i.p.) into the mice 1 and 8 d before termination. Histomorphometric analyses of cortical bone were done using 20- $\mu$ m-thick transverse cross-sectional sections in the middiaphyseal region of femur.

**Quantitative Real-Time PCR Analysis.** Total RNA from whole humerus was prepared using TriZol Reagent (Life Technologies). The RNA was reverse-transcribed into cDNA, and real-time PCR analysis was performed using the ABI Prism 7000 Sequence Detection System (PE Applied Biosystems). We used pre-designed real-time PCR assays from Applied Biosystems for analysis of OPG (Mm00435452\_m1), LIFR (Mm00442940\_m1), and IL-1ra (probe, CAG CGC TGT GTC AAT GCG GAG G; forward primer, GAA GCT CAG TGC CGC CA; reverse primer, TTC ATG TGG TGG TCC AGC TTT). The mRNA abundance of each gene was calculated using the standard curve method (User Bulletin 2; PE Applied Biosystems) and adjusted for the expression of 18S.

**Bone Marrow and Thymus Cellularity and Cell Distribution.** Bone marrow cells were harvested by flushing 5 mL PBS solution through the bone cavity of one femur and one humerus by using a syringe. After centrifugation at 515  $\times$  g for 5 min, pelleted cells

were resuspended in Tris-buffered 0.83% NH<sub>4</sub>Cl solution (pH 7.29) for 5 min to lyse erythrocytes and then washed in PBS solution. Bone marrow cells were resuspended in RPMI culture medium (PAA Laboratories) before use. The total number of leukocytes in bone marrow was calculated using an automated cell counter (Sysmex). For flow cytometry analyses, cells were stained with phycoerythrin-conjugated antibodies to CD19 for detection of B lymphocytes. The cells were then subjected to FACS analysis on a FACSCalibur device (BD Pharmingen) and analyzed by using FlowJo software. Results are expressed as cell frequency (in percentages).

**Enzyme-Linked Immunosorbent Spot Assay.** Enumeration of IgM-, IgG-, and IgA-secreting bone marrow cells was performed using the enzyme-linked immunosorbent spot technique (12). Briefly,

96-well nitrocellulose plates (Millipore) were coated with affinity-purified F(ab')<sub>2</sub> fragments of goat anti-mouse IgM, IgG, and IgA (5 µg/mL diluted in PBS solution; Cappel; Oragon Teknika). After incubation overnight at 4 °C and blocking with 5% FCS, 50,000 freshly isolated bone marrow cells, diluted in Iscove culture medium, were added in triplicate. The plates were incubated for 3.5 h at 37 °C in 5% CO<sub>2</sub> and 85% humidity and thereafter rinsed and incubated with alkaline phosphatase-conjugated goat anti-mouse IgM, IgG, and IgA antibodies (diluted 1:750 in PBS solution) at 4 °C overnight. After rinsing, the wells were incubated with 5-bromo-4-chloro-3-indolyl phosphate and nitroblue tetrazolium for 1 h for visualization of the spots. The number of Ig-secreting cells was expressed as the frequency of spot-forming cells per 10<sup>3</sup> CD19<sup>+</sup> cells.

1. Dupont S, et al. (2000) Effect of single and compound knockouts of estrogen receptors alpha (ERalpha) and beta (ERbeta) on mouse reproductive phenotypes. *Development* 127:4277–4291.
2. Billon-Galés A, et al. (2009) The transactivating function 1 of estrogen receptor alpha is dispensable for the vasculoprotective actions of 17beta-estradiol. *Proc Natl Acad Sci USA* 106:2053–2058.
3. Börjesson AE, et al. (2010) The role of estrogen receptor  $\alpha$  in growth plate cartilage for longitudinal bone growth. *J Bone Miner Res* 25:2414–2424.
4. Windahl SH, Vidal O, Andersson G, Gustafsson JA, Ohlsson C (1999) Increased cortical bone mineral content but unchanged trabecular bone mineral density in female ERbeta(-/-) mice. *J Clin Invest* 104:895–901.
5. Vidal O, et al. (2000) Estrogen receptor specificity in the regulation of skeletal growth and maturation in male mice. *Proc Natl Acad Sci USA* 97:5474–5479.
6. Movérare S, et al. (2003) Differential effects on bone of estrogen receptor alpha and androgen receptor activation in orchidectomized adult male mice. *Proc Natl Acad Sci USA* 100:13573–13578.
7. Waarsing JH, Day JS, Weinans H (2004) An improved segmentation method for in vivo microCT imaging. *J Bone Miner Res* 19:1640–1650.
8. Hildebrand T, Rüeggsegger P (1997) Quantification of bone microarchitecture with the structure model index. *Comput Methods Biomech Biomed Engin* 1:15–23.
9. Baron RVA, Neff L, Silverglate A, Maira AS (1983) Processing of undecalcified bone specimens for bone histomorphometry. *Bone Histomorphometry: Techniques and Interpretation*, ed Recker RR (CRC Press, Boca Raton, FL), pp 18–29.
10. Eriksen EFAD, Melsen F (1994) *Bone Histomorphometry* (Raven, New York).
11. Parfitt AM, et al.; Report of the ASBMR Histomorphometry Nomenclature Committee (1987) Bone histomorphometry: Standardization of nomenclature, symbols, and units. *J Bone Miner Res* 2:595–610.
12. Czerkinsky CC, et al. (1984) An immunoenzyme procedure for enumerating fibronectin-secreting cells. *J Immunoassay* 5:291–302.



**Table S2. Histomorphometry in ER $\alpha$ AF-1<sup>0</sup> mice**

| Parameter                           | WT              |                  | KO              |                              |
|-------------------------------------|-----------------|------------------|-----------------|------------------------------|
|                                     | OVX             | E2               | OVX             | E2                           |
| Trabecular bone (L4 vertebrae)      |                 |                  |                 |                              |
| BV/TV (%)                           | 13.0 $\pm$ 1.3  | 25.3 $\pm$ 1.6*  | 12.4 $\pm$ 1.0  | 11.2 $\pm$ 1.0 <sup>†</sup>  |
| Trabecular                          |                 |                  |                 |                              |
| number (1/mm)                       | 3.5 $\pm$ 0.2   | 6.7 $\pm$ 0.4*   | 3.5 $\pm$ 0.2   | 3.3 $\pm$ 0.2 <sup>†</sup>   |
| Trabecular                          |                 |                  |                 |                              |
| thickness ( $\mu$ m)                | 36.0 $\pm$ 1.6  | 37.1 $\pm$ 1.1   | 34.2 $\pm$ 1.3  | 32.3 $\pm$ 1.4               |
| N.Oc/B.Pm (1/mm)                    | 2.13 $\pm$ 0.19 | 1.84 $\pm$ 0.12  | 2.18 $\pm$ 0.10 | 2.44 $\pm$ 0.16*             |
| Oc.S/BS (%)                         | 5.64 $\pm$ 0.52 | 5.41 $\pm$ 0.40  | 5.90 $\pm$ 0.33 | 6.72 $\pm$ 0.38 <sup>†</sup> |
| Cortical bone (femur diaphysis)     |                 |                  |                 |                              |
| Periosteal                          |                 |                  |                 |                              |
| circumference (mm)                  | 4.36 $\pm$ 0.03 | 4.36 $\pm$ 0.06  | 4.33 $\pm$ 0.06 | 4.33 $\pm$ 0.06              |
| Endosteal                           |                 |                  |                 |                              |
| circumference (mm)                  | 3.22 $\pm$ 0.03 | 2.85 $\pm$ 0.06* | 3.17 $\pm$ 0.04 | 2.95 $\pm$ 0.04*             |
| MS/BS endosteal (%)                 | 56.6 $\pm$ 2.0  | 93.9 $\pm$ 2.1*  | 59.1 $\pm$ 1.8  | 85.7 $\pm$ 4.3*              |
| BFR/BS                              |                 |                  |                 |                              |
| endosteal                           |                 |                  |                 |                              |
| ( $\mu$ m <sup>2</sup> / $\mu$ m/d) | 0.66 $\pm$ 0.06 | 1.75 $\pm$ 0.14* | 0.67 $\pm$ 0.04 | 1.19 $\pm$ 0.19*             |
| MAR endosteal ( $\mu$ m/d)          | 1.16 $\pm$ 0.10 | 1.85 $\pm$ 0.12* | 1.13 $\pm$ 0.06 | 1.36 $\pm$ 0.17              |

BFR/BS, bone formation rate/bone surface; E2, estradiol treatment of OVX; MAR, mineral apposition rate; MS/BS, mineralized surface/BS; N.Oc/B.Pm, number of osteoclasts/bone perimeter; Oc.S/BS, osteoclast surface/BS. Values are given as means  $\pm$  SEM.

\* $P < 0.05$  vs. OVX and <sup>†</sup> $P < 0.05$ , E2 effect in KO vs. E2 effect in WT.

<sup>†</sup>Significant vs. WT E2 ( $n = 9-11$ ).
